# Supplementary material for: Context-aware API recommendation using tensor factorization
Source: Springer Nature journal article supplement (doi:10.1007/s11432-021-3529-9), 2023-01-12
Supplement: 11432_2021_3529_MOESM1_ESM.pdf [file 11432_2021_3529_MOESM1_ESM.pdf]

• Supplementary File •

# Context-aware API recommendation using tensor factorization

Yu ZHOU<sup>1,3</sup>, Chen CHEN<sup>1</sup>, Yongchao WANG<sup>1</sup>, Tingting HAN<sup>2</sup> & Taolue CHEN<sup>2,3\*</sup>

<sup>1</sup>*College of Computer Science and Technology, Nanjing University of Aeronautics and Astronautics, Nanjing 211106, China;*

<sup>2</sup>*Birkbeck, University of London, London WC1E 7HX, UK;*

<sup>3</sup>*State Key Laboratory for Novel Software Technology, Nanjing University, Nanjing 210023, China*

**Table S1** MRR, MAP, SuccessRate, Precision, Recall, NDCG for class-level API recommendation (Top1, Top3)

| Context | Metric      | Top1  |       |                 | Top3  |       |                 |
|---------|-------------|-------|-------|-----------------|-------|-------|-----------------|
|         |             | CARTF | RACK  | Improvement (%) | CARTF | RACK  | Improvement (%) |
| 0%      | MRR         | 0.589 | 0.366 | 60.93           | 0.678 | 0.484 | 40.08           |
|         | MAP         | 0.379 | 0.246 | 54.07           | 0.530 | 0.355 | 49.30           |
|         | SuccessRate | 0.589 | 0.366 | 60.93           | 0.794 | 0.628 | 26.43           |
|         | Precision   | 0.589 | 0.366 | 60.93           | 0.345 | 0.242 | 42.56           |
|         | Recall      | 0.379 | 0.246 | 54.07           | 0.624 | 0.458 | 36.24           |
|         | NDCG        | 0.589 | 0.366 | 60.93           | 0.706 | 0.519 | 36.03           |
| 20%     | MRR         | 0.549 | 0.353 | 55.52           | 0.657 | 0.465 | 41.29           |
|         | MAP         | 0.362 | 0.246 | 47.15           | 0.531 | 0.351 | 51.28           |
|         | SuccessRate | 0.549 | 0.353 | 55.52           | 0.794 | 0.604 | 31.46           |
|         | Precision   | 0.549 | 0.353 | 55.52           | 0.342 | 0.228 | 50.00           |
|         | Recall      | 0.362 | 0.246 | 47.15           | 0.640 | 0.454 | 40.97           |
|         | NDCG        | 0.549 | 0.353 | 55.52           | 0.691 | 0.499 | 38.48           |
| 40%     | MRR         | 0.496 | 0.293 | 69.28           | 0.588 | 0.395 | 48.86           |
|         | MAP         | 0.379 | 0.236 | 60.59           | 0.500 | 0.328 | 52.44           |
|         | SuccessRate | 0.496 | 0.293 | 69.28           | 0.701 | 0.526 | 33.27           |
|         | Precision   | 0.496 | 0.293 | 69.28           | 0.275 | 0.188 | 46.28           |
|         | Recall      | 0.379 | 0.236 | 60.59           | 0.592 | 0.437 | 35.47           |
|         | NDCG        | 0.496 | 0.293 | 69.28           | 0.615 | 0.428 | 43.69           |
| 60%     | MRR         | 0.450 | 0.210 | 114.29          | 0.539 | 0.304 | 77.30           |
|         | MAP         | 0.391 | 0.190 | 105.79          | 0.493 | 0.278 | 77.34           |
|         | SuccessRate | 0.450 | 0.210 | 114.29          | 0.648 | 0.424 | 52.83           |
|         | Precision   | 0.391 | 0.210 | 86.19           | 0.238 | 0.146 | 63.01           |
|         | Recall      | 0.391 | 0.190 | 105.79          | 0.590 | 0.385 | 53.25           |
|         | NDCG        | 0.450 | 0.210 | 114.29          | 0.565 | 0.335 | 68.66           |
| 80%     | MRR         | 0.378 | 0.180 | 110.00          | 0.470 | 0.261 | 80.08           |
|         | MAP         | 0.368 | 0.177 | 107.91          | 0.461 | 0.257 | 79.38           |
|         | SuccessRate | 0.378 | 0.180 | 110.00          | 0.587 | 0.365 | 60.82           |
|         | Precision   | 0.378 | 0.180 | 110.00          | 0.197 | 0.121 | 62.81           |
|         | Recall      | 0.368 | 0.177 | 107.91          | 0.575 | 0.360 | 59.72           |
|         | NDCG        | 0.378 | 0.180 | 110.00          | 0.500 | 0.288 | 73.61           |
| Average | MRR         | 0.492 | 0.280 | 82.00           | 0.586 | 0.382 | 57.52           |
|         | MAP         | 0.376 | 0.219 | 75.10           | 0.503 | 0.314 | 61.95           |
|         | SuccessRate | 0.492 | 0.280 | 82.00           | 0.705 | 0.509 | 40.96           |
|         | Precision   | 0.481 | 0.280 | 76.39           | 0.279 | 0.185 | 52.93           |
|         | Recall      | 0.376 | 0.219 | 75.10           | 0.604 | 0.419 | 45.13           |
|         | NDCG        | 0.492 | 0.280 | 82.00           | 0.615 | 0.414 | 52.09           |

**Table S2** MRR, MAP, SuccessRate, Precision, Recall, NDCG for class-level API recommendation (Top5, Top10)

| Context | Metric      | Top5  |       |                 | Top10 |       |                 |
|---------|-------------|-------|-------|-----------------|-------|-------|-----------------|
|         |             | CARTF | RACK  | Improvement (%) | CARTF | RACK  | Improvement (%) |
| 0%      | MRR         | 0.695 | 0.515 | 34.95           | 0.706 | 0.528 | 33.71           |
|         | MAP         | 0.563 | 0.392 | 43.62           | 0.589 | 0.417 | 41.25           |
|         | SuccessRate | 0.871 | 0.762 | 14.30           | 0.947 | 0.849 | 11.54           |
|         | Precision   | 0.245 | 0.189 | 29.63           | 0.146 | 0.118 | 23.73           |
|         | Recall      | 0.719 | 0.586 | 22.70           | 0.824 | 0.697 | 18.22           |
|         | NDCG        | 0.729 | 0.571 | 27.67           | 0.747 | 0.595 | 25.55           |
| 20%     | MRR         | 0.671 | 0.495 | 35.56           | 0.682 | 0.508 | 34.25           |
|         | MAP         | 0.560 | 0.385 | 45.45           | 0.582 | 0.409 | 42.30           |
|         | SuccessRate | 0.854 | 0.735 | 16.19           | 0.938 | 0.827 | 13.42           |
|         | Precision   | 0.237 | 0.176 | 34.66           | 0.139 | 0.110 | 26.36           |
|         | Recall      | 0.720 | 0.578 | 24.57           | 0.825 | 0.689 | 19.74           |
|         | NDCG        | 0.713 | 0.549 | 29.87           | 0.733 | 0.575 | 27.48           |
| 40%     | MRR         | 0.611 | 0.425 | 43.76           | 0.622 | 0.441 | 41.04           |
|         | MAP         | 0.529 | 0.361 | 46.54           | 0.551 | 0.382 | 44.24           |
|         | SuccessRate | 0.801 | 0.659 | 21.55           | 0.885 | 0.773 | 14.49           |
|         | Precision   | 0.196 | 0.147 | 33.33           | 0.115 | 0.092 | 25.00           |
|         | Recall      | 0.695 | 0.564 | 23.23           | 0.804 | 0.680 | 18.24           |
|         | NDCG        | 0.655 | 0.482 | 35.89           | 0.678 | 0.517 | 31.14           |
| 60%     | MRR         | 0.559 | 0.337 | 65.88           | 0.570 | 0.358 | 59.22           |
|         | MAP         | 0.520 | 0.312 | 66.67           | 0.534 | 0.332 | 60.84           |
|         | SuccessRate | 0.738 | 0.570 | 29.47           | 0.821 | 0.717 | 14.50           |
|         | Precision   | 0.169 | 0.121 | 39.67           | 0.095 | 0.077 | 23.70           |
|         | Recall      | 0.694 | 0.528 | 31.44           | 0.780 | 0.664 | 17.47           |
|         | NDCG        | 0.601 | 0.396 | 51.77           | 0.627 | 0.444 | 41.22           |
| 80%     | MRR         | 0.497 | 0.300 | 65.67           | 0.510 | 0.320 | 59.38           |
|         | MAP         | 0.488 | 0.294 | 65.99           | 0.503 | 0.315 | 59.68           |
|         | SuccessRate | 0.703 | 0.532 | 32.14           | 0.798 | 0.679 | 17.53           |
|         | Precision   | 0.142 | 0.106 | 33.96           | 0.081 | 0.068 | 19.12           |
|         | Recall      | 0.691 | 0.520 | 32.88           | 0.788 | 0.667 | 18.14           |
|         | NDCG        | 0.547 | 0.357 | 53.22           | 0.579 | 0.406 | 42.61           |
| Average | MRR         | 0.607 | 0.414 | 49.16           | 0.618 | 0.431 | 45.52           |
|         | MAP         | 0.532 | 0.349 | 53.65           | 0.552 | 0.371 | 49.66           |
|         | SuccessRate | 0.793 | 0.652 | 22.73           | 0.878 | 0.769 | 14.30           |
|         | Precision   | 0.198 | 0.148 | 34.25           | 0.115 | 0.093 | 23.58           |
|         | Recall      | 0.704 | 0.555 | 26.96           | 0.804 | 0.679 | 18.36           |
|         | NDCG        | 0.649 | 0.471 | 39.68           | 0.673 | 0.507 | 33.60           |

**Table S3** MRR, MAP, SuccessRate, Precision, Recall, NDCG for method-level API recommendation (Top1, Top3)

| Context | Metric      | Top1  |       |                 | Top3  |       |                 |
|---------|-------------|-------|-------|-----------------|-------|-------|-----------------|
|         |             | CARTF | BIKER | Improvement (%) | CARTF | BIKER | Improvement (%) |
| 0%      | MRR         | 0.473 | 0.386 | 22.54           | 0.560 | 0.490 | 14.29           |
|         | MAP         | 0.267 | 0.241 | 10.79           | 0.384 | 0.324 | 18.52           |
|         | SuccessRate | 0.473 | 0.386 | 22.54           | 0.672 | 0.620 | 8.39            |
|         | Precision   | 0.473 | 0.386 | 22.54           | 0.299 | 0.232 | 28.88           |
|         | Recall      | 0.267 | 0.241 | 10.79           | 0.460 | 0.403 | 14.14           |
|         | NDCG        | 0.473 | 0.386 | 22.54           | 0.587 | 0.521 | 12.67           |
| 20%     | MRR         | 0.450 | 0.369 | 21.95           | 0.536 | 0.472 | 13.56           |
|         | MAP         | 0.266 | 0.240 | 10.83           | 0.384 | 0.322 | 19.25           |
|         | SuccessRate | 0.450 | 0.369 | 21.95           | 0.643 | 0.602 | 6.81            |
|         | Precision   | 0.450 | 0.369 | 21.95           | 0.284 | 0.223 | 27.35           |
|         | Recall      | 0.266 | 0.240 | 10.83           | 0.453 | 0.400 | 13.25           |
|         | NDCG        | 0.450 | 0.369 | 21.95           | 0.564 | 0.504 | 11.90           |
| 40%     | MRR         | 0.413 | 0.319 | 29.47           | 0.496 | 0.413 | 20.10           |
|         | MAP         | 0.273 | 0.232 | 17.67           | 0.384 | 0.307 | 25.08           |
|         | SuccessRate | 0.413 | 0.319 | 29.47           | 0.604 | 0.532 | 13.53           |
|         | Precision   | 0.413 | 0.319 | 29.47           | 0.248 | 0.188 | 31.91           |
|         | Recall      | 0.273 | 0.232 | 17.67           | 0.466 | 0.387 | 20.41           |
|         | NDCG        | 0.413 | 0.319 | 29.47           | 0.523 | 0.443 | 18.06           |
| 60%     | MRR         | 0.351 | 0.235 | 49.36           | 0.423 | 0.309 | 36.89           |
|         | MAP         | 0.281 | 0.201 | 39.80           | 0.370 | 0.262 | 41.22           |
|         | SuccessRate | 0.351 | 0.235 | 49.36           | 0.519 | 0.400 | 29.75           |
|         | Precision   | 0.351 | 0.235 | 49.36           | 0.20  | 0.135 | 49.63           |
|         | Recall      | 0.281 | 0.201 | 39.80           | 0.450 | 0.334 | 34.73           |
|         | NDCG        | 0.351 | 0.235 | 49.36           | 0.448 | 0.332 | 34.94           |
| 80%     | MRR         | 0.289 | 0.189 | 52.91           | 0.357 | 0.243 | 46.91           |
|         | MAP         | 0.265 | 0.181 | 46.41           | 0.335 | 0.230 | 45.65           |
|         | SuccessRate | 0.289 | 0.189 | 52.91           | 0.440 | 0.310 | 41.94           |
|         | Precision   | 0.289 | 0.189 | 52.91           | 0.154 | 0.103 | 49.51           |
|         | Recall      | 0.265 | 0.181 | 46.41           | 0.411 | 0.290 | 41.72           |
|         | NDCG        | 0.289 | 0.189 | 52.91           | 0.378 | 0.260 | 45.38           |
| Average | MRR         | 0.395 | 0.300 | 35.25           | 0.474 | 0.385 | 26.35           |
|         | MAP         | 0.270 | 0.219 | 25.10           | 0.371 | 0.289 | 29.95           |
|         | SuccessRate | 0.395 | 0.300 | 35.25           | 0.576 | 0.493 | 20.08           |
|         | Precision   | 0.395 | 0.300 | 35.25           | 0.237 | 0.176 | 37.46           |
|         | Recall      | 0.270 | 0.219 | 25.10           | 0.448 | 0.363 | 24.85           |
|         | NDCG        | 0.395 | 0.300 | 35.25           | 0.500 | 0.412 | 24.59           |

**Table S4** MRR, MAP, SuccessRate, Precision, Recall, NDCG for method-level API recommendation (Top5, Top10)

| Context | Metric      | Top5  |       |                 | Top10 |       |                 |
|---------|-------------|-------|-------|-----------------|-------|-------|-----------------|
|         |             | CARTF | BIKER | Improvement (%) | CARTF | BIKER | Improvement (%) |
| 0%      | MRR         | 0.576 | 0.515 | 11.84           | 0.588 | 0.526 | 11.79           |
|         | MAP         | 0.418 | 0.345 | 21.16           | 0.438 | 0.362 | 20.99           |
|         | SuccessRate | 0.744 | 0.727 | 2.34            | 0.829 | 0.812 | 2.09            |
|         | Precision   | 0.223 | 0.168 | 32.74           | 0.132 | 0.103 | 28.16           |
|         | Recall      | 0.546 | 0.479 | 13.99           | 0.634 | 0.571 | 11.03           |
|         | NDCG        | 0.613 | 0.565 | 8.50            | 0.638 | 0.585 | 9.06            |
| 20%     | MRR         | 0.558 | 0.497 | 12.27           | 0.569 | 0.508 | 12.01           |
|         | MAP         | 0.421 | 0.341 | 23.46           | 0.437 | 0.357 | 22.41           |
|         | SuccessRate | 0.740 | 0.709 | 4.37            | 0.824 | 0.791 | 4.17            |
|         | Precision   | 0.217 | 0.161 | 34.78           | 0.126 | 0.097 | 29.90           |
|         | Recall      | 0.559 | 0.476 | 17.44           | 0.637 | 0.564 | 12.94           |
|         | NDCG        | 0.601 | 0.548 | 9.67            | 0.627 | 0.567 | 10.58           |
| 40%     | MRR         | 0.514 | 0.435 | 18.16           | 0.528 | 0.447 | 18.12           |
|         | MAP         | 0.409 | 0.325 | 25.85           | 0.425 | 0.338 | 25.74           |
|         | SuccessRate | 0.683 | 0.626 | 9.11            | 0.779 | 0.710 | 9.72            |
|         | Precision   | 0.179 | 0.134 | 33.58           | 0.105 | 0.080 | 31.25           |
|         | Recall      | 0.545 | 0.458 | 19.00           | 0.631 | 0.540 | 16.85           |
|         | NDCG        | 0.554 | 0.481 | 15.18           | 0.584 | 0.506 | 15.42           |
| 60%     | MRR         | 0.440 | 0.327 | 34.56           | 0.451 | 0.337 | 33.83           |
|         | MAP         | 0.392 | 0.278 | 41.01           | 0.403 | 0.288 | 39.93           |
|         | SuccessRate | 0.594 | 0.478 | 24.27           | 0.672 | 0.553 | 21.52           |
|         | Precision   | 0.145 | 0.099 | 46.46           | 0.083 | 0.058 | 43.10           |
|         | Recall      | 0.525 | 0.399 | 31.58           | 0.594 | 0.467 | 27.19           |
|         | NDCG        | 0.478 | 0.364 | 31.32           | 0.504 | 0.387 | 30.23           |
| 80%     | MRR         | 0.374 | 0.258 | 44.96           | 0.388 | 0.267 | 45.32           |
|         | MAP         | 0.352 | 0.245 | 43.67           | 0.366 | 0.255 | 43.53           |
|         | SuccessRate | 0.517 | 0.375 | 37.87           | 0.615 | 0.443 | 38.83           |
|         | Precision   | 0.109 | 0.075 | 45.33           | 0.065 | 0.045 | 44.44           |
|         | Recall      | 0.488 | 0.354 | 37.85           | 0.584 | 0.423 | 38.06           |
|         | NDCG        | 0.410 | 0.287 | 42.86           | 0.442 | 0.309 | 43.04           |
| Average | MRR         | 0.492 | 0.406 | 24.36           | 0.505 | 0.417 | 24.21           |
|         | MAP         | 0.398 | 0.307 | 31.03           | 0.414 | 0.320 | 30.52           |
|         | SuccessRate | 0.656 | 0.583 | 15.59           | 0.744 | 0.662 | 15.27           |
|         | Precision   | 0.175 | 0.127 | 38.58           | 0.102 | 0.077 | 35.37           |
|         | Recall      | 0.533 | 0.433 | 23.97           | 0.616 | 0.513 | 21.22           |
|         | NDCG        | 0.531 | 0.449 | 21.50           | 0.559 | 0.471 | 21.67           |
